# Supplementary material for: A new aza-BODIPY based NIR region colorimetric and fluorescent chemodosimeter for fluoride
Source: Royal Society of Chemistry journal article supplement (doi:10.1039/c4ra06416j), 2014-10-03

# A new aza-BODIPY based NIR region colorimetric and fluorescent chemodosimeter for fluoride

Bin Zou, Hui Liu, John Mack, Sisi Wang, Jiangwei Tian, Hua Lu, Zhifang Li, and Zhen Shen

## II. Supplementary data

<sup>1</sup>H NMR spectra.....S1

<sup>13</sup>C NMR spectra.....S2

..

I) <sup>1</sup>H NMR spectra of compound 1

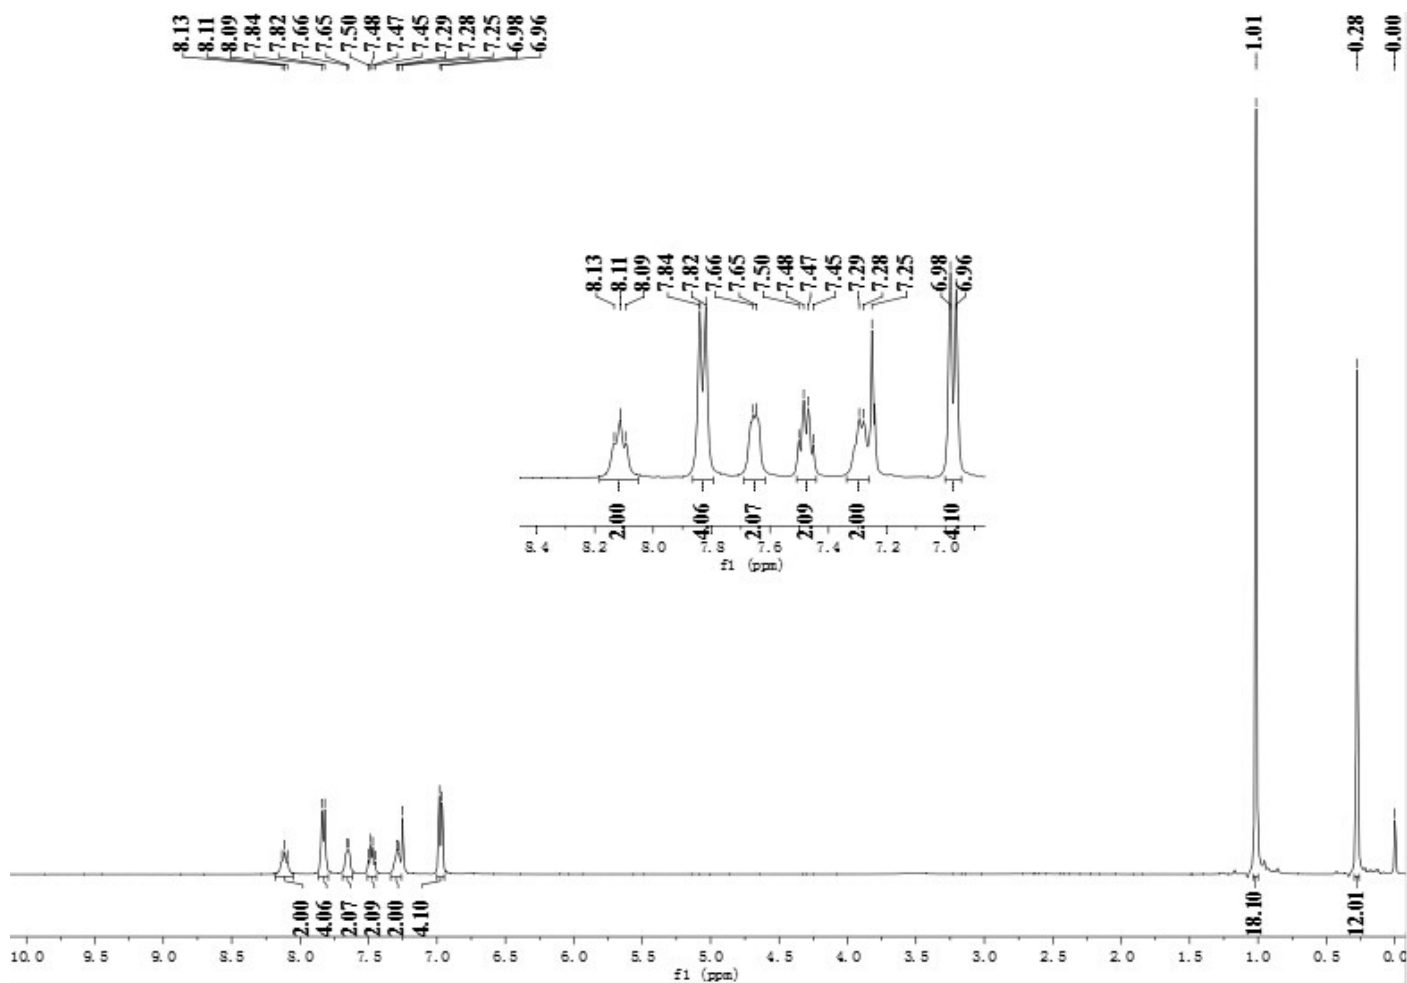

## II) $^{13}\text{C}$ NMR spectra of compound **1**

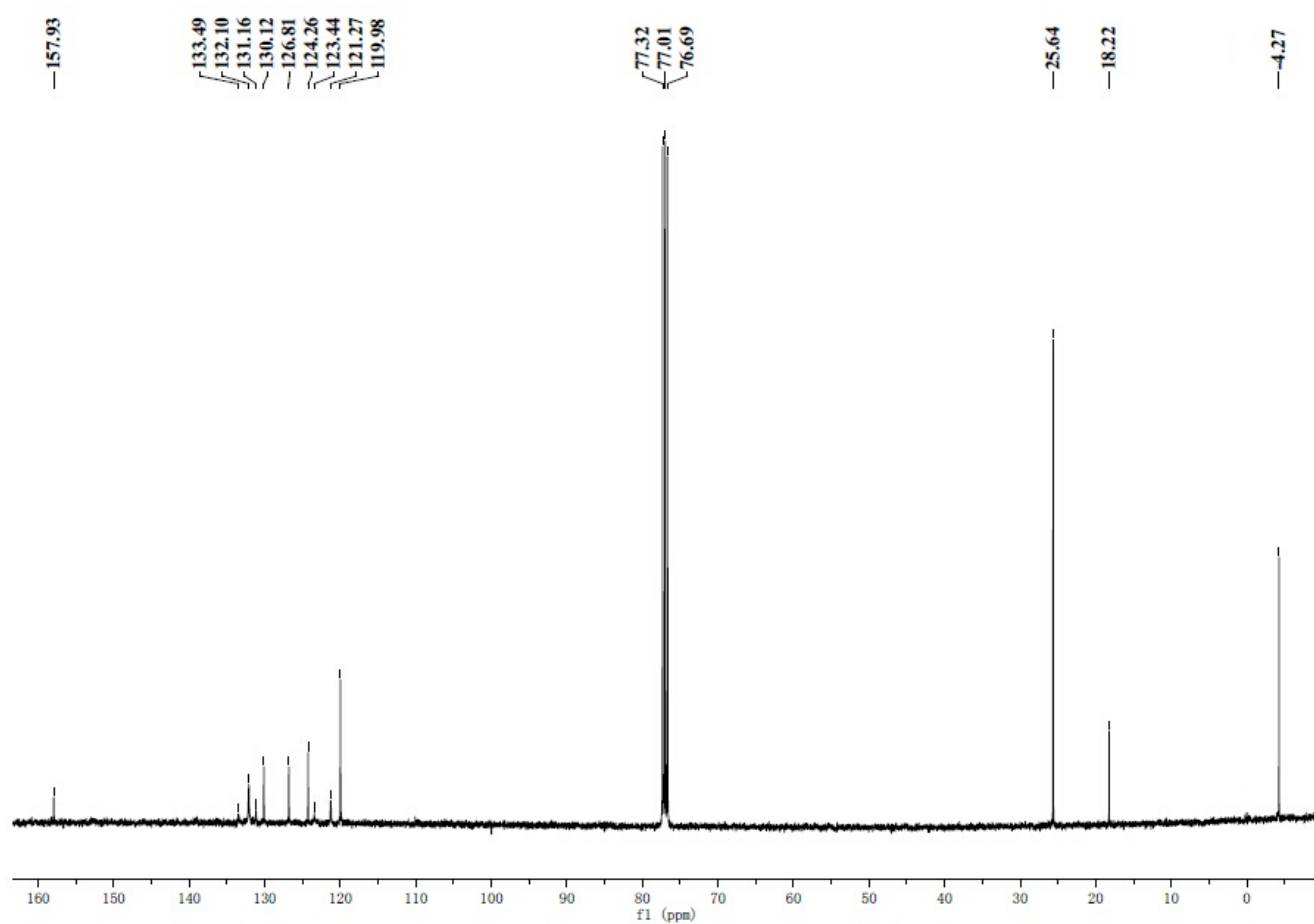

Supplement: c4ra06416j1.pdf [file c4ra06416j1.pdf]
